# Supplementary material for: Integrative bioinformatics and experimental analysis revealed down-regulated CDC42EP3 as a novel prognostic target for ovarian cancer and its roles in immune infiltration
Source: PeerJ. 2021 Sep 15;9:e12171. doi: 10.7717/peerj.12171 (PMC8449529; doi:10.7717/peerj.12171)
Supplement: Supplemental Information 4 [file peerj-09-12171-s004.xlsx]

## Sheet: Yoshihara Ovarian+UP
Up-regulated genes in Yoshihara Ovarian from the Oncomine database.
ABCF3
ABHD11
ABHD17C
ABHD3
ABI2
ACOT11
ACOT4
ACP6
ACTL10
ACTR3B
ACVR2B
ACY1
ADAM28
ADCK5
ADGRG1
ADPRHL1
AGBL5
AGRN
AGTRAP
AHCY
AIFM1
AK8
ALAD
ALG10
ALG3
ALKBH4
AMPD3
AMY1C
AMY2A
AMY2B
ANKRD18A
ANKRD65
ANKZF1
ANLN
ANXA3
AP1G2
AP3M2
APEH
APITD1
APOBEC3B
APOBEC3D
APOC1
APOOL
AQP5
ARHGAP8
ARHGEF16
ARHGEF5
ARL17A
ARL4C
ARL4C
ARRDC1
ASF1B
ASPHD1
ASPM
ASRGL1
ASS1
ATAD2
ATP1B1
AURKA
B3GNT3
B4GALNT4
BATF2
BDH1
BEX2
BHLHE41
BICD1
BIK
BIRC5
BLM
BMP7
BMS1P5
BNIP3
BORA
BRAF
BRCC3
BRI3BP
BST2
BUB1B
C10orf35
C10orf95
C11orf52
C11orf80
C12orf60
C14orf79
C15orf48
C16orf59
C17orf53
C18orf25
C19orf33
C19orf48
C19orf57
C1GALT1
C1orf112
C1orf186
C1RL
C20orf96
C22orf29
C5orf30
C6orf136
C8orf33
C9orf116
CA14
CA8
CADM1
CAPG
CAPN1
CAPN13
CAPS
CAPSL
CARD14
CARD9
CBS
CCDC142
CCDC150
CCHCR1
CCL28
CCNB1
CCNB2
CCNE1
CD22
CD24
CD47
CD74
CD82
CDC20
CDC45
CDC6
CDC7
CDCA4
CDCA5
CDCA7
CDCA7L
CDCA8
CDH1
CDK1
CDK5
CDKN2A
CDKN3
CDS1
CDT1
CELF4
CELSR1
CENPA
CENPE
CENPF
CENPH
CENPL
CENPM
CENPN
CENPO
CENPU
CEP41
CEP72
CEP72
CFAP70
CFB
CHAF1A
CHAF1B
CHEK2
CHI3L1
CHKA
CHML
CHMP4C
CHODL
CHST4
CHST6
CHTF18
CKAP2
CKS2
CLCN2
CLDN23
CLDN3
CLDN4
CLDN7
CLEC18B
CLIC3
CLUHP3
CMTM7
CMTM8
COL23A1
COL9A2
COMTD1
CORO2A
CORT
COX15
COX5A
COX5B
CP
CPAMD8
CPNE3
CPT2
CRB3
CREB3L4
CSE1L
CSNK2A1
CSTF1
CSTF2
CTAGE15
CTAGE5
CTSV
CXCL10
CXCL13
CXCL9
CXorf38
CXXC5
CYB561
CYBA
CYC1
CYP3A5
CYP3A7
CYP4B1
DAPL1
DARS2
DBF4
DBNDD1
DCAF11
DCAF15
DCBLD2
DCLRE1A
DCLRE1C
DDIAS
DDR1
DDX11
DEFB1
DENND2D
DERL3
DHCR24
DHCR7
DHRS2
DIP2B
DLGAP1-AS2
DMKN
DNAH7
DNASE1L2
DNMT3A
DNMT3B
DPCD
DPP3
DRC1
DSCC1
DSG2
DSN1
DSP
DTL
DTNB
DTX3L
DUS4L
E2F5
EARS2
EBP
ECE2
ECHDC3
ECT2
EDARADD
EEF1E1
EFCAB11
EFNA1
EFNA4
EGFL6
EIF4EBP1
ELF3
ELL3
ELMO3
EME1
ENC1
ENO1
EPCAM
EPOR
EPPK1
EPS8L1
EPS8L2
EPSTI1
ERBB2
ERMP1
ERO1A
ERP27
ESPL1
ESRP2
ETV4
EVA1A
EVPL
EXO1
EXOSC4
EXOSC5
EZH2
EZR
F12
FAAH
FAAH2
FAAP24
FAM110A
FAM122B
FAM136A
FAM174B
FAM181A
FAM187A
FAM199X
FAM200A
FAM213B
FAM24B
FAM60A
FAM64A
FAM91A1
FAM96A
FANCA
FANCF
FANK1
FARSA
FASTKD1
FBXL16
FBXL18
FBXL6
FBXO2
FBXO21
FBXO6
FBXW9
FCGBP
FEN1
FGF18
FGFR2
FGFRL1
FKBP4
FOLH1
FOLR1
FOLR3
FOXJ1
FRAT2
FUT5
FZD3
FZD5
FZD6
GALE
GALNT12
GALNT14
GALNT2
GAPDH
GATC
GBP5
GCHFR
GCNT1
GEMIN7
GET4
GGH
GINS2
GINS3
GJB1
GLS2
GMCL1
GMNN
GMPR
GMPS
GNL3L
GOLT1A
GPD2
GPI
GPR107
GPR160
GPR180
GPRC5C
GPRIN2
GPT
GPT2
GRAMD1C
GRB7
GRHL1
GRHL2
GRHL3
GTF3C2
GTF3C3
H2AFX
HACD3
HAGHL
HAUS6
HDGF
HDHD3
HGH1
HILPDA
HIST1H1C
HIST1H1E
HIST1H2AB
HIST1H2AD
HIST1H2AE
HIST1H2AH
HIST1H2AK
HIST1H2AL
HIST1H2BB
HIST1H2BC
HIST1H2BD
HIST1H2BE
HIST1H2BF
HIST1H2BH
HIST1H2BI
HIST1H2BJ
HIST1H2BK
HIST1H2BL
HIST1H2BM
HIST1H2BN
HIST1H2BO
HIST1H3B
HIST1H3H
HIST1H4F
HIST1H4H
HIST1H4J
HIST1H4K
HIST2H2AA3
HIST2H4A
HIST2H4B
HIST3H2A
HIST3H2BB
HKDC1
HLA-DOB
HMBS
HMGB2
HMGB3
HMGB3P1
HN1
HN1L
HOOK1
HOOK2
HOXB8
HPDL
HPN
HPSE
HRASLS
HSD17B1
HSD17B8
HSH2D
HTATIP2
IDH2
IDO1
IFI27
IFI30
IFI6
IGF2BP2
IGF2BP3
IGFBP2
IGSF9
IL1RAP
IL20RB
IL23A
IL4I1
INCENP
INHA
IQCA1
IQCC
IQCD
IQCG
ISG15
ISYNA1
ITCH
ITGA3
ITGB3BP
ITGB7
ITGB8
ITPR3
JUP
KCNE3
KCNN4
KCTD1
KDF1
KDM4A
KIAA0101
KIAA0907
KIAA1551
KIF15
KIF20A
KIF22
KIF23
KIF2C
KIFC1
KLF5
KLHDC9
KLHL24
KLHL35
KLK1
KLK10
KLK11
KLK5
KLK6
KLK8
KNSTRN
KNTC1
KRT15
KRT17
KRT18
KRT19
KRT23
KRT5
KRT8
KRTCAP3
L2HGDH
LACTB2
LAD1
LAMB3
LAMC2
LAMP3
LAPTM4B
LARGE2
LGR4
LGR6
LIG1
LINC00467
LINC00839
LINC01089
LINC01106
LINC01138
LLGL2
LMAN1
LMLN
LMNB1
LMO7
LOC100506282
LOC728743
LPAR2
LRFN4
LRP8
LRRC1
LRRC14
LRRC45
LRRC6
LRRC61
LRRC8D
LRTOMT
LSM4
LSR
LY6E
LY75
LYPD6
LYPLA1
LYPLA2
MAD2L1
MAGEF1
MAGIX
MAL
MANEAL
MAP7
MAPK13
MARCKSL1
MAST1
MAT1A
MAZ
MCCC2
MCM2
MCM3AP-AS1
MCM4
MCM5
MCM6
MCM7
MCM8
MCM9
MCOLN2
MCRIP2
MDK
MECOM
MESP1
MEST
MFSD3
MGAT4B
MGME1
MICB
MIF
MIPEP
MIS18A
MKI67
MLXIPL
MMP1
MMP7
MNS1
MOCOS
MORN3
MOSPD3
MOV10
MPZL2
MREG
MRPL12
MRPL13
MRPL15
MRPL2
MRPL3
MRPS12
MRS2
MSH2
MSH5
MSI2
MST1R
MT1F
MT3
MTBP
MTERF1
MTF2
MTG1
MTIF2
MUC1
MUC20
MX1
MYBL2
MYBPC2
MYBPH
MYCBP
MYEF2
MYO10
MYO6
MZT2B
NAA40
NCAPD2
NCAPG
NCAPG2
NCAPH
NCBP2
NCOA2
NDC1
NDUFAF6
NDUFS8
NEK11
NFE2L3
NIF3L1
NIPAL3
NIPSNAP1
NME9
NMU
NOXA1
NOXO1
NPHP3
NR2C2AP
NR2F6
NRIR
NRTN
NSG1
NSUN5
NSUN5P1
NUDT15
NUDT5
NUDT6
NUDT8
NUF2
NUS1
NUSAP1
OAS1
OAS3
OBSCN
OCIAD2
OGFOD2
OIP5
OPLAH
OPN3
OR7E24
OR8B8
ORC4
ORC6
OSBP2
OSBPL3
OTUD6B
OXLD1
OXNAD1
OXSM
P2RY2
P2RY6
PACSIN1
PAFAH1B3
PAICS
PAIP1
PAK4
PAM16
PAQR4
PAQR6
PARP1
PARP12
PARPBP
PARS2
PASK
PAX8
PBX4
PCBD1
PCBD2
PCK2
PCNA
PDCD2L
PDIA4
PDK1
PDXK
PDZK1IP1
PECR
PEG10
PERP
PGAP2
PGK1
PHGDH
PHKG2
PKM
PKMYT1
PKP2
PKP3
PLA2G12A
PLA2G7
PLAGL2
PLCXD1
PLEKHB2
PLK4
PLPP2
PLXNB1
PNMA3
PNMAL1
POC1A
PODXL2
POLA2
POLD1
POU5F1
PPARGC1B
PPAT
PPFIBP2
PPIF
PPL
PPM1J
PPP1R14C
PPP1R16A
PPP1R26
PPP1R35
PPP1R9A
PRC1
PRELID3B
PRIM1
PRKCI
PRKCZ
PRKX
PROM2
PROSER2
PRR7
PRRG4
PRRT3
PRSS2
PRSS21
PRSS22
PRSS8
PSAT1
PSD4
PSENEN
PSMG3
PSPH
PSRC1
PTER
PTGR2
PTGS1
PTPN14
PTPN3
PTPN4
PTPRF
PTPRS
PTTG1
PTTG2
PUF60
PYCR1
PYCRL
QPRT
RAB11FIP4
RAB26
RAB3IP
RAB42
RAB6B
RAC3
RACGAP1
RAD21
RAD51
RAD54B
RAE1
RANBP17
RAP1GAP
RARRES3
RASAL1
RASGEF1A
RASGRP1
RASSF7
RBKS
RBM38
RBM41
RBM47
RCAN3
RCC1
RCC2
RDH13
REC8
RECQL4
REPIN1
REST
RFC3
RFC4
RFC5
RFWD3
RFXANK
RGL3
RHNO1
RHPN1
RHPN2
RIBC1
RIBC2
RIPK4
RMI1
RMI2
RMND5A
RNASEH2A
RNASET2
RNFT2
RORC
RPA3
RPL39L
RPUSD3
RRAGD
RRM2
RSPH14
RSRP1
RTKN
RTN4R
RTP4
RUVBL1
S100A2
SAC3D1
SARS2
SCD
SCG5
SCGB1D1
SCGB1D2
SCGB2A1
SCNN1A
SCRIB
SDC1
SDSL
SEC14L4
SERPINA5
SETDB1
SEZ6L2
SFN
SFT2D3
SFXN1
SGO2
SGPL1
SH2D3A
SH2D4A
SH3RF2
SH3YL1
SHMT1
SHMT2
SHTN1
SIGLEC15
SKAP1
SLAIN1
SLAMF8
SLC12A8
SLC13A5
SLC16A3
SLC16A5
SLC16A6
SLC22A18
SLC25A10
SLC25A16
SLC25A24
SLC25A29
SLC25A40
SLC2A1
SLC2A11
SLC2A5
SLC35F2
SLC35F3
SLC37A4
SLC39A10
SLC39A4
SLC4A11
SLC52A3
SLC9A3R1
SLC9A7
SLPI
SLX1A
SMARCC1
SMC2
SMC5
SMCO2
SMPD2
SMPDL3B
SORD
SORL1
SORT1
SOX9
SP1
SPA17
SPAG4
SPAG5
SPAG8
SPDEF
SPDL1
SPICE1
SPINT2
SPIRE2
SPOCK2
SPP1
SPSB2
SPTBN2
SQLE
SRPK1
SSC4D
ST14
ST3GAL6
ST6GALNAC1
ST6GALNAC2
STAG3
STAG3L3
STAP2
STAT1
STEAP3
STMN1
STOX1
STRA6
STRBP
STRC
STXBP2
STXBP6
STYXL1
SUSD3
SWSAP1
SYK
SYNGR3
SYT17
SYTL1
TACC3
TACSTD2
TAF4
TAPBPL
TARBP2
TARS2
TAS2R10
TBC1D31
TBC1D7
TBL1XR1
TCF7
TDP1
TEKT2
TERT
TFDP2
TFF2
TGM1
TGOLN2
THEM6
THOC3
TIGD5
TIMELESS
TK1
TLCD1
TLE6
TM7SF2
TMC4
TMC6
TMCO6
TMEM102
TMEM125
TMEM132A
TMEM139
TMEM177
TMEM209
TMEM223
TMEM254
TMEM33
TMEM38A
TMEM41A
TMEM61
TMEM68
TMEM69
TMEM79
TMEM92
TMPO
TMPRSS4
TMTC4
TNFSF10
TNNI3
TOM1L1
TOPBP1
TPD52
TPD52L1
TPI1
TRAIP
TRIB3
TRIM14
TRIM17
TRIM52
TRIP13
TROAP
TSGA10
TSPAN1
TST
TSTA3
TSTD1
TTC12
TTC26
TTC30A
TTC30B
TTF2
TXK
TYMS
TYSND1
UBD
UBE2C
UBE2T
UBFD1
UBXN10
UCP2
UGT2B10
UHRF1
UMPS
UNC93B1
UNG
UPK3B
USP18
USP28
USP54
USP6NL
VAMP8
VAV3
VCX2
VEGFA
VMA21
WBSCR27
WDHD1
WDR34
WDR54
WDR62
WDR66
WDR78
WDR91
WNT10A
XAGE5
XPO1
XPR1
YARS2
YBX2
YPEL1
ZBED6CL
ZC2HC1C
ZDHHC12
ZDHHC13
ZDHHC16
ZDHHC20
ZDHHC21
ZDHHC23
ZMYM3
ZMYND10
ZMYND12
ZMYND8
ZNF107
ZNF117
ZNF138
ZNF165
ZNF208
ZNF217
ZNF239
ZNF250
ZNF273
ZNF3
ZNF320
ZNF429
ZNF43
ZNF430
ZNF440
ZNF485
ZNF486
ZNF493
ZNF506
ZNF512B
ZNF518A
ZNF544
ZNF550
ZNF572
ZNF587
ZNF627
ZNF664
ZNF675
ZNF678
ZNF681
ZNF691
ZNF707
ZNF714
ZNF782
ZNF786
ZNF816
ZNF839
ZNF85
ZNF91
ZNHIT2
ZSCAN16
ZXDC

## Sheet: Bonome Ovarian+UP
Up-regulated genes in Bonome Ovarian from the Oncomine database.
ABHD11
ACTB
ACTN1
ACTN4
ADGRG1
ADRM1
AGRN
APOE
ARF5
ARID1A
ARPC4-TTLL3
ASS1
ATP2A2
ATP5G3
ATP5H
BANF1
BCAM
BCL2L2-PABPN1
BGN
BIK
BIRC5
BOLA2B
BTG3
C1orf106
C9orf16
CALR
CCNE1
CD24
CD74
CDC20
CDC42BPB
CDK1
CDK16
CDKN2A
CKS1B
CKS2
CLDN10
CLDN3
CLDN4
CLDN7
CLPTM1
CLU
CNOT3
COL18A1
COL1A1
COL4A1
COL4A2
COL6A2
COMP
COPE
COPG1
COX7B
CP
CRABP2
CRIP2
CXCR4
CYAT1
DDA1
DEFB1
EIF4G1
EIF5A
ELF3
ENO1
EPCAM
EPHX1
FASN
FKBP8
FLNA
FOLR1
FOSB
FOXM1
FXYD3
GALNT6
GANAB
GINS1
GLDC
GRINA
GSTP1
H2AFX
H2BFS
H3F3AP4
HGS
HIST1H1C
HIST2H2AA3
HIST2H2AA4
HMGA1
HN1
HSF1
HSPD1
HSPG2
HYOU1
IDH2
IFI27
IFI6
IGFBP2
IGHA2
IGK
IGKC
IGKV1OR2-108
IGLC1
IGLV1-44
IL32
INHBB
INS-IGF2
INTS3
ISG15
JUNB
JUND
JUP
KDELR1
KIAA0101
KLHDC3
KLK6
KLK8
KRT17
LAMP1
LCN2
LOC100506248
LOC101929219
LOC101929368
LSM4
LSR
LYPD1
MAL
MAZ
MDK
MECOM
MFAP2
MFSD10
MIR1282
MIR7112
MIR7113
MIR8071-2
MMP11
MMP7
MRPL2
MRPS12
MT1X
MTHFD2
MUC1
NDUFB7
NDUFV2
NEK2
NOTCH3
NT5DC2
NUCB1
P4HB
PAX8
PDLIM7
PEA15
PFKP
PFN1
PKM
PNN
POLR2I
PPDPF
PRAME
PRKCSH
PRKDC
PRMT1
PRSS8
PTTG1
PUF60
RACGAP1
RBBP4
RFXANK
RGCC
RGS1
RHOB
RPL36A-HNRNPH2
RPL37A
RPL38
RPN1
RPS7
S100A1
S100A11
S100A13
S100A2
S100A4
S100A6
SCGB1D2
SCGB2A1
SETSIP
SIVA1
SLC39A4
SLC4A5
SLC52A2
SNORA68
SNRPE
SORT1
SOX17
SOX9
SPON1
SST
STIP1
SUB1
SYNGR2
TAGLN
TAGLN2
TCEB2
THBS1
TMED2
TNNT1
TOP2A
TPX2
TRIM28
TRIP13
TTK
TUBA1B
TUBA1C
TUBA4A
TUBB
UBE2C
UBE2S
UCP2
UQCRQ
VCAN
VTCN1
VWA1
WFDC2
YWHAE
YWHAZ
ZFP36L1
ZNF593
ZYX

## Sheet: Yoshihara Ovarian+DOWN
Down-regulated genes in Yoshihara Ovarian from the Oncomine database.
A2M
ABCG2
ABLIM3
ABR
ACKR3
ACTA2
ACTG2
ACTN1
ACVRL1
ADAM19
ADAM33
ADAMTS1
ADAMTS5
ADCY4
ADGRA2
ADGRE5
ADGRF5
ADIRF
AEBP1
AKR1C3
ALDH1A1
ALDH1B1
ANG
ANGPTL2
ANKRD35
ANO1
ANTXR2
ANXA6
AOC3
AP1S2
APBB1
APOD
APOLD1
AQP1
ARHGAP10
ARHGEF25
ARID5B
ASB2
ASGR1
ATL1
ATP10D
ATP1B3
ATP8B2
AXL
BAG2
BAG3
BAHCC1
BAMBI
BATF3
BDKRB2
BEGAIN
BMP2
BOC
BTG2
C10orf54
C16orf45
C1QTNF2
C1QTNF5
C1R
C1S
C4orf32
C7
CAB39L
CACNA1C
CACNA1H
CALD1
CAMK1
CAMK2N1
CAV1
CAV2
CBX7
CCDC102B
CCDC107
CCDC3
CCDC80
CCIN
CCL19
CCL2
CCL21
CCL8
CCND2
CCSER2
CD248
CD44
CD69
CDC42EP2
CDC42EP3
CDKN1A
CELF2
CFD
CFH
CFHR3
CFL2
CFP
CGNL1
CHRD
CLDN5
CLEC14A
CLEC1A
CLEC3B
CLIP3
CNKSR3
CNN1
CNRIP1
CNTNAP1
COL15A1
COL16A1
COL1A2
COL3A1
COL4A2
COL5A2
COL6A1
COL6A2
COL6A3
COLGALT2
COX7A1
CPE
CPNE5
CPQ
CPXM2
CREM
CRIM1
CRLF1
CRTAP
CRYAB
CSF3
CSGALNACT1
CSPG4
CSRNP1
CSRP1
CTGF
CTSK
CXCL1
CXCL12
CXCL2
CXCL3
CXorf36
CYBRD1
CYR61
DAB2
DACT1
DACT3
DCHS1
DCN
DCUN1D3
DENND2A
DES
DFNA5
DKK3
DLC1
DLG4
DLL1
DMPK
DNAJB4
DNAJB5
DOCK11
DPT
DSTN
DUSP1
DUSP26
DUSP5
DUSP8
DYSF
ECSCR
EFS
EGFL7
EGR1
EGR2
ELL2
EMCN
EMILIN1
EMP1
EMP3
ENPEP
ENPP2
EPAS1
EPB41L3
EPS8
ERG
ERRFI1
ESAM
ETS2
F10
FAM110D
FAM129A
FAM198B
FAP
FAXDC2
FBLN1
FBLN2
FBLN5
FBN1
FBXL7
FCN1
FERMT2
FEZ1
FGF13
FGF7
FGL2
FGR
FHL1
FIBIN
FILIP1L
FLNA
FLNC
FMOD
FOLR2
FOS
FOSB
FOSL2
FOXC1
FOXN3
FPR1
FRY
FRZB
FSTL1
FSTL3
FXYD6
FYCO1
G0S2
GABARAPL1
GADD45B
GADD45G
GALNT16
GALNT18
GAS1
GATA6
GDPD5
GEM
GFPT2
GGTA1P
GIMAP1
GIMAP4
GIMAP5
GIMAP6
GIMAP8
GJA4
GJB3
GJC2
GLIPR1
GLIPR2
GLT8D2
GNG11
GNG12
GPER1
GPIHBP1
GPNMB
GPR161
GPR183
GPR4
GPRASP1
GPRASP2
GRASP
GRK5
GSN
GSTM5
GUCY1A3
GULP1
GYPC
HABP4
HBA1
HBA2
HBB
HBEGF
HBM
HBQ1
HEG1
HEPH
HEYL
HGF
HIC1
HIGD1B
HLX
HMCN2
HOPX
HPGDS
HSPA1A
HSPA2
HSPB2
HTRA3
ICAM1
ICAM2
ID2
ID3
IER2
IER3
IGF1
IGFBP4
IGFBP5
IGFBP6
IGFBP7
IL34
IL3RA
IL4R
ILK
INPP1
INPP4B
ISLR
ITGA1
ITGA11
ITGA5
ITGA7
ITGB1BP2
ITIH5
ITM2A
ITPR1
JAM2
JUN
JUNB
JUND
KANK2
KANK3
KCNJ8
KCNK6
KCNMB1
KIAA0513
KLF10
KLF2
KLF4
KLF6
KLF9
LAMA4
LAMB1
LATS2
LAYN
LGI4
LHFP
LHX6
LILRB2
LIMA1
LIMS2
LINC00341
LMCD1
LMO2
LMOD1
LOC102724428
LOC338620
LPP
LTBP1
LTBP4
LUM
LYNX1
LZTS1
MAF
MAFF
MAN1C1
MAOA
MAOB
MAP1A
MAP3K7CL
MAP3K8
MAPK11
MAPK12
MARCH3
MARVELD1
MASP1
MATN2
MCAM
MCF2L
MEF2C
MEIS2
MFAP4
MFRP
MGP
MICAL1
MMP19
MMP23B
MMP28
MPRIP
MRAS
MRGPRF
MRVI1
MSC
MT1M
MTMR9LP
MTURN
MXRA8
MYADM
MYC
MYH3
MYL9
MYOM1
NACAD
NAMPT
NAV1
NBL1
NDN
NDRG2
NEDD9
NEFM
NES
NEXN
NFATC1
NFIA
NFIL3
NFKBIZ
NGFR
NLRP1
NLRP3
NNMT
NOSTRIN
NOTCH4
NPNT
NPY4R
NR2F1
NR3C2
NR4A1
NR4A2
NRN1
NRP2
NTRK2
NUAK1
OLFML2B
OLFML3
OSR1
P3H3
PADI4
PALLD
PALMD
PAPSS2
PCDH12
PCDH17
PCDH18
PCOLCE
PCP4
PDE2A
PDE4B
PDGFA
PDGFRB
PDGFRL
PDLIM2
PDLIM3
PDLIM5
PDLIM7
PDS5B
PECAM1
PER1
PHLDA1
PHLDB2
PI16
PIEZO2
PIK3R3
PIM1
PKIG
PLA2G4C
PLA2G5
PLAGL1
PLPP1
PLPP3
PLPP7
PLS3
PLSCR4
PLVAP
PLXDC1
PMP22
POPDC2
POU6F1
PPM1K
PPP1R14A
PPP1R15A
PRELP
PRKCDBP
PRKCH
PRKD1
PROCR
PRPH
PRRT2
PTGER4
PTH1R
PTN
PTPRB
PTRF
RAB23
RAMP1
RAMP2
RASD1
RASIP1
RASSF2
RBP7
RBPMS
RCAN1
RCSD1
RECK
RFX2
RGCC
RGMA
RGS16
RGS2
RGS5
RND3
RNF122
ROBO4
ROR2
RRAD
RUNX1T1
S100A8
S1PR1
S1PR4
SACS
SAMD4A
SBDS
SCARF2
SCHIP1
SDC2
SELM
SEMA6A
SERP2
SERPINF1
SERTAD1
SETBP1
SFRP1
SFRP4
SGCA
SGCE
SGK1
SH2D3C
SH3D19
SH3PXD2A
SIK1
SLC12A5
SLC16A2
SLC19A2
SLC22A17
SLC24A3
SLC47A1
SLCO2A1
SLIT2
SLIT3
SLMAP
SMARCA2
SMOC2
SMTN
SNAI1
SNAI2
SNCA
SNPH
SNRK
SOBP
SOCS2
SOCS3
SOD3
SORBS2
SOX8
SPARC
SPARCL1
SPATA3
SPG20
SPHK1
SPON2
SRGN
STARD13
STBD1
STK26
STOM
STX12
STX2
SULF1
SULF2
SVIL
SYNC
SYNE1
SYNPO
TACC1
TAGLN
TBX1
TBX3
TBXA2R
TCEAL1
TCEAL2
TCEAL4
TCEAL5
TCF4
TEK
TFF3
TFPI
TGFB3
TGFBR2
TGFBR3
THBD
THBS2
THBS2
THY1
TIMP3
TIPARP
TLE2
TMEM158
TMEM200A
TMEM204
TMEM47
TMEM55A
TMEM59L
TMEM71
TMEM88
TNC
TNFAIP3
TNS1
TNS2
TNXB
TPM1
TPM2
TPSAB1
TRPV2
TSHZ3
TSPAN5
TSPYL2
TUBB2A
TUBB6
TWIST1
VEGFC
VENTX
VIM
VWF
WFDC1
WISP2
YPEL4
ZBTB16
ZCCHC24
ZDHHC14
ZEB2
ZFP36
ZNF331
ZNF385B
ZNF521

## Sheet: Bonome Ovarian+DOWN
Down-regulated genes in Bonome Ovarian from the Oncomine database.
ABCA8
ACPP
ACSL1
ACSL3
ADAM9
ADAMTS3
ADGRG6
ADH1B
ADH5
ADO
AFF1
AKAP7
AKT3
ALDH1A1
ALDH1A3
ALDH3A2
ALDH6A1
AMIGO2
AMMECR1
ANK3
ANKRA2
ANOS1
ANXA3
ANXA4
ANXA8L1
AOX1
AQP9
ARAP2
ARFIP1
ARHGAP44
ARHGAP6
ARHGEF10
ARMC8
ARMCX1
ASAH1
ASPH
ATF1
ATG5
ATMIN
ATP10D
ATP2C1
ATP8A1
ATXN1
BAMBI
BCHE
BCL2
BDH2
BICC1
BNC1
BPTF
BTAF1
C21orf62
C3
CADPS2
CALB2
CALD1
CAST
CAV1
CAV2
CBX7
CCNG2
CDC14B
CDC42BPA
CDC42EP3
CDKN1B
CDV3
CELF2
CETN3
CFH
CFHR1
CFI
CHGB
CHMP2B
CHMP5
CHN2
CHRDL1
CHST15
CIRBP
CLDN15
CLEC4M
CLIC5
CLK1
CMAHP
COBLL1
COL4A5
COLEC12
COMMD3-BMI1
CPE
CPVL
CREBL2
CSGALNACT1
CSGALNACT2
CSTA
CSTF2T
CUX1
CYB5A
CYP39A1
DAAM1
DAPK1
DCN
DCUN1D4
DDHD2
DDX17
DFNA5
DHRS7
DHX29
DICER1
DIRAS3
DKFZP586I1420
DLG5
DMD
DMXL1
DNAJB9
DOCK4
DPP4
DPY19L1
DPYD
DPYSL2
DSC3
DSE
DST
ECI2
ECM2
EFEMP1
EFHC1
EHBP1
EID1
EIF4B
EIF5
ELOVL5
EPB41L4B
EPS15
EPS8
ETS2
EZR
FAM120A
FAM134B
FAM13A
FAM13B
FAM179B
FAM208A
FAM65B
FAS
FAT1
FBXL5
FBXO3
FBXO9
FBXW2
FEM1B
FERMT2
FEZ2
FGF13
FGF9
FHL1
FKBP11
FLRT3
FNDC3A
FRMD4B
FRY
FYCO1
FZD1
FZD7
GABARAPL3
GALC
GALNT11
GALNT12
GAS1
GATA6
GCA
GCOM1
GFPT2
GHR
GJA1
GLS
GNG11
GPM6A
GPR137B
GPRASP1
GRAMD1C
GRB10
GREB1
GSAP
GSPT2
HAS1
HBA2
HBB
HBG2
HDAC4
HEBP1
HEG1
HERC1
HERC2
HERC2P9
HMGCR
HNMT
HNRNPA3
HNRNPD
HNRNPDL
HOXC6
HP
HPR
HS2ST1
HSD17B11
HSD17B2
HSD17B4
HSD17B6
HSPA2
HTATSF1
IBTK
ID2B
ID4
IFI16
IFI16
IGFBP6
IL18
IL1R1
IL6ST
IMPA1
ING3
IQGAP1
IRS1
ISCA1
ISOC1
ITGAM
KAT2B
KDR
KIAA0226L
KIAA0368
KIAA0430
KIDINS220
KLF10
KLF4
LAMA4
LAMB1
LAMP2
LANCL1
LEPROT
LGALS2
LGALS8
LHX2
LIPA
LOC100294033
LOC100506718
LOC101926921
LOC101928635
LOC101928830
LOC101929500
LOC101930363
LOC101930416
LOC728392
LUC7L3
LXN
LY75-CD302
LYZ
MAF
MAN1A1
MAOA
MAP3K5
MAP3K8
MARCO
MARK3
MBP
MDFIC
ME1
MED13
MEF2C
MEIS2
MEOX2
MET
METTL7A
MFF
MICA
MIR22
MNDA
MPDZ
MS4A4A
MST1
MTUS1
MYRF
N4BP2L1
N4BP2L2
NAP1L3
NBEA
NBR1
NCOA4
NDN
NDNF
NDUFA5
NEFH
NEK7
NELL2
NFIB
NFYB
NKX3-1
NLGN4X
NPEPPS
NPTN
NPY1R
NR2F1
NR2F2
NR3C1
NRXN3
NSG1
NT5C1B-RDH14
NT5E
OAT
OGN
OGT
OLFML1
OSBPL1A
OSTM1
PAFAH1B1
PAPSS2
PARVA
PAXBP1
PCDH9
PCF11
PCMT1
PCOLCE2
PDE8B
PDGFC
PDGFD
PDGFRA
PDLIM5
PDPN
PDZD2
PEG3
PER2
PGRMC2
PHACTR2
PHF3
PHKB
PHLPP2
PICALM
PIK3R1
PIP5K1B
PITPNC1
PJA2
PKD2
PKN2
PLA2G4A
PLCB1
PLCE1
PLCL2
PLIN2
PLPP1
PLSCR4
PMP22
PNISR
PNMA1
PNMAL1
PNRC2
PODXL
PPP2R5C
PPWD1
PREPL
PRG4
PRKAR1A
PRKAR2B
PRKCA
PRNP
PROCR
PROS1
PSD3
PTCH1
PTGDR
PTGER3
PTGER4
PTGIS
PTP4A2
PTPN13
PTPRC
PTPRZ1
PURA
QKI
RAB11FIP2
RAB38
RABGAP1
RABGAP1L
RALGAPA1
RAP2C
RAPGEF2
RARRES1
RASA1
RBL2
RBM25
RCHY1
RDX
RECK
REEP1
RGL1
RGS4
RHOT1
RNASE4
RNF103-CHMP3
RNF128
RNF38
ROCK1
RRAS2
RSRP1
RTN1
RTN4
RUFY3
RUNX1T1
S100A8
S100PBP
SACM1L
SAP18
SARAF
SCAMP1
SCG5
SCP2
SDC2
SDCBP
SEC24B
SECISBP2
SEH1L
SEL1L3
SEMA3C
SEMA5A
SEPT10
SERINC1
SERPINB9
SFPQ
SFRP1
SGCG
SH3BGRL
SH3BP5
SH3GLB1
SHTN1
SIRPA
SLC16A1
SLC25A36
SLC30A5
SLC31A2
SLC39A6
SLC39A8
SLC46A3
SLC4A4
SLC7A8
SLK
SLTM
SMAD2
SMARCA2
SNCA
SNCAIP
SNORD45C
SNX1
SNX7
SOBP
SPAG9
SPOCK1
ST3GAL5
STK26
SULF1
SUN1
SVEP1
SYPL1
TACC1
TARDBP
TBC1D4
TBC1D9
TCEAL2
TCF21
TCF4
TDP2
TFPI
TFPI2
TGFBR2
THBD
THOC2
TIAM1
TJP2
TLE4
TMEM255A
TMEM5
TMEM50A
TMX2-CTNND1
TMX4
TNFAIP8
TNFRSF10B
TNKS
TNPO1
TNXB
TOB1
TPBG
TPD52L1
TPP1
TRA2A
TRAF5
TRAK2
TRIM2
TRMT1L
TRPC1
TSPAN13
TSPAN5
TSPAN8
TSPYL1
TTC28
TVP23B
TXNDC15
TXNIP
UBA3
UBE2I
UBL3
UFSP2
UHRF1BP1L
UPK1B
UPK3B
USP12
VLDLR
VPS13C
WASF3
WDFY3
WDR44
WLS
WNT2B
WNT5A
WRB
WSB1
WT1
YTHDC2
ZBED5
ZBTB1
ZBTB18
ZBTB20
ZCCHC8
ZDHHC17
ZFPM2
ZKSCAN7
ZNF112
ZNF23
ZNF330
ZNF395
ZNF45
ZNF573
