# Supplementary material for: Integrative bioinformatics and experimental analysis revealed down-regulated CDC42EP3 as a novel prognostic target for ovarian cancer and its roles in immune infiltration
Source: PeerJ. 2021 Sep 15;9:e12171. doi: 10.7717/peerj.12171 (PMC8449529; doi:10.7717/peerj.12171)
Supplement: Supplemental Information 5 [file peerj-09-12171-s005.xlsx]

## Sheet: m6A target genes
Supplementary Table S2. The m6A target genes of ovarian cancer acquired from the RMVar database.
AARS1
ABHD15
ABL2
ABTB2
ACBD3
ACIN1
ACTB
ACTG1
ACTR1A
ACVR2B
ADAM10
ADCK2
ADCY9
AFF1
AGPAT4
AGTPBP1
AHNAK
AK2
AKAP12
AKAP13
AKAP6
AKAP8L
AKAP9
AKT3
ALCAM
ALDH1B1
ANKHD1
ANKLE2
ANKRD11
ANKRD26
AOC2
AOPEP
AP3B1
AP3M1
APC
APEX1
APOB
ARF6
ARFIP1
ARHGAP35
ARHGEF28
ARID1B
ARID4B
ASH1L
ASPH
ASXL1
ATAD2
ATG9A
ATMIN
ATRX
ATXN2
ATXN2L
AUNIP
AVL9
B3GAT3
BAMBI
BAZ1B
BCL2L1
BCL7B
BCLAF1
BCOR
BCORL1
BECN1
BEX1
BICD2
BIRC3
BOD1
BOD1L1
BOLA3
BRD9
BSDC1
BSN
BTBD1
BTBD11
C11orf24
C16orf58
C3orf62
C4orf3
C8orf76
CABIN1
CACHD1
CAMK2D
CAMK2N1
CAMKV
CANT1
CAP2
CBFA2T2
CBWD1
CCDC120
CCDC51
CCDC71
CCDC88C
CCNJ
CCNT2
CCT4
CD163
CD2BP2
CDC42EP3
CDC7
CDCA4
CDCP1
CDK12
CDK5RAP2
CDS1
CEBPZ
CEPT1
CFAP44
CFL1
CHD6
CHD7
CHD8
CHRAC1
CHST15
CHST2
CKAP5
CLCN5
CLTC
CMC4
CNTNAP4
COL6A3
COLGALT2
COPS2
COQ8A
CPNE1
CPNE8
CPS1
CPSF3
CRIM1
CRTC3
CSAG4
CSE1L
CSNK1D
CSNK1G2
CSRNP1
CTNNA1
CTR9
CUL4A
CYLD
CYTH3
DAB1
DCAF11
DCAF7
DCP1B
DCTN2
DDB1
DDX23
DDX5
DDX59
DEPDC1B
DHTKD1
DHX37
DHX38
DISP1
DNAJB5
DNAJC1
DNAJC14
DNTTIP2
DOK2
DOP1A
DPCD
DPP8
DSC2
DSG2
DSTN
DTX3L
DUSP16
DYNC1H1
DYNC1LI2
DYNLL2
DYRK3
EAF1
EARS2
EDEM3
EEF1B2
EEF2
EFL1
EHBP1
EIF4A1
EIF4E3
EIF4G2
ELAC2
EML4
EPB41L3
EPC2
ERCC4
ERCC5
ERRFI1
EWSR1
EXO1
EXOC7
EXOC8
EXTL2
FAM160A2
FAM171A1
FAM171B
FAM200A
FAM20C
FAM217B
FAM234A
FAM81A
FAM89A
FAM98A
FASTKD3
FAT1
FAT2
FBXL18
FBXL5
FBXO11
FBXO8
FEM1A
FGD1
FKBP10
FMNL2
FMNL3
FOXM1
FOXP2
FYN
GAD1
GALM
GAPVD1
GART
GAS7
GAS8
GATAD1
GCLM
GCN1
GIGYF1
GLE1
GLG1
GLMP
GLRX3
GLUD1
GNAI2
GNAL
GOLGA5
GOLGB1
GPN1
GPRASP1
GPRASP2
GPRC5B
GPRIN3
GRB10
GRIPAP1
GSTK1
GTF2H1
H3-3B
H3C12
HADHA
HBS1L
HCFC1
HDAC1
HDHD5
HEBP1
HELQ
HGSNAT
HIF1A
HINT3
HIPK2
HIRIP3
HIVEP1
HLCS
HMGN5
HMMR
HMOX2
HNRNPC
HOXA7
HOXB9
HPD
HPS6
HSP90AB1
IBTK
IER5
IFT57
IGF1R
IKZF2
IKZF5
IL7R
IMPAD1
INPP5K
IRF4
IRS1
IRS4
ITM2B
JAGN1
JUN
KAT6B
KBTBD6
KBTBD8
KCTD1
KDM5A
KDM5C
KIAA0100
KIAA0355
KIAA1328
KIF24
KLC2
KLHL23
KLHL28
KLHL9
KLK7
KMT2B
KTN1
KYAT3
L3MBTL2
LACC1
LAMTOR4
LARP6
LATS1
LGALS3BP
LINS1
LIPH
LMO7
LPAR1
LRIF1
LRP12
LRP5
LRRFIP2
LSG1
LUZP1
LYPD1
LZTR1
MACIR
MAGI3
MAN1A2
MAPK8IP1
MASTL
MB21D2
MBNL2
MCCC1
MCM3AP
MCOLN3
MDC1
MEA1
MECP2
MED13
MED16
MED23
MED26
METRN
MFAP3
MFAP3L
MFSD9
MGA
MICA
MID1
MKI67
MKNK2
MKRN2
MLLT10
MLX
MMP24OS
MON1B
MORC3
MOSPD2
MPG
MPP6
MRFAP1
MRPL20
MRPL40
MRPS2
MRPS5
MSH6
MSL1
MSL2
MSMO1
MTF1
MTMR14
MTR
MTX2
MUL1
MYEOV
N4BP2
N4BP2L2
NAA10
NAA20
NAB2
NACC1
NAGPA
NBDY
NCAPG
NCAPH2
NCOA4
NCOA6
NDUFA12
NDUFB5
NDUFV3
NELFB
NEU1
NFRKB
NIF3L1
NIN
NIPA2
NIPSNAP1
NKX2-5
NME1
NME2
NNT
NOL8
NOMO1
NRP1
NSD1
NSD3
NSG1
NTHL1
NTMT1
NUCKS1
NUDT1
NUDT3
NUDT6
NUFIP2
NUMA1
NUP153
NUP42
NUP43
NXF1
ODC1
OIP5
OXSM
P4HA1
PABPC4
PALB2
PAPOLA
PASK
PAXBP1
PBX1
PCBP1
PCBP4
PCCB
PCDH19
PCDH20
PCDH9
PCF11
PCGF6
PCLO
PCNX1
PCNX2
PCNX4
PCSK6
PDE4DIP
PDGFRA
PDIA6
PDXDC1
PEX1
PFAS
PHF10
PHF8
PHLDB2
PI4KB
PITPNM2
PJA2
PKD2
PKHD1
PLD1
PLOD1
PLXNA2
PMPCA
PNMA2
PNN
PNRC1
POGK
POGLUT3
POLA1
POLD3
POLDIP2
POLR2D
POU3F2
PPL
PPP1CC
PPP1R15B
PPP1R7
PPP1R8
PPP2R3A
PRKAA2
PROK2
PRRC1
PRUNE1
PSAP
PSD3
PSEN1
PSENEN
PSIP1
PSMB2
PSMC3
PSMD4
PSMG3
PSPH
PTCD1
PTEN
PTK2
PTPN1
PTPRF
PXMP4
PYGO1
QSOX1
R3HDM2
RABGEF1
RACK1
RAD23A
RAD23B
RADX
RAPGEF6
RASA2
RAVER2
RBBP6
RBM27
RCL1
RECQL
RECQL5
REST
RFXANK
RGL2
RGS20
RHOD
RIC8B
RNF103
RNF128
RNF213
RNF6
ROMO1
RPL23
RPL36
RPL7
RPS24
RRBP1
RRN3
RRP1B
RSBN1L
RSF1
RUFY1
RWDD3
SCAMP3
SDC1
SEC14L1
SELENOF
SEMA6D
SERPINI1
SESN1
SETDB1
SETX
SF3B3
SGK2
SH3BP4
SH3PXD2A
SIAH2
SIMC1
SIPA1L1
SIPA1L2
SKIV2L
SLC16A14
SLC1A3
SLC1A4
SLC20A1
SLC25A13
SLC25A3
SLC26A11
SLC31A2
SLC35B1
SLC38A2
SLC5A6
SLC6A15
SLCO4A1
SLF1
SLFN11
SLITRK3
SLITRK5
SMAD1
SMAD4
SMARCA5
SMARCAL1
SMARCC2
SMCR8
SMOC1
SMYD5
SNRNP200
SNX15
SNX18
SOD2
SPAST
SPEN
SPG11
SPRY2
SPTBN1
SRCAP
SRRM2
SRSF10
SS18
SSBP1
SSBP4
SSH2
STAM
STAMBP
STIM1
STX3
SYNE3
SYNRG
SYP
SYT7
TAB1
TACC2
TACC3
TADA2B
TAF1B
TAF3
TAGAP
TANC2
TARS3
TBC1D23
TBC1D5
TBC1D9B
TBX3
TCEAL4
TCF20
TCF7L2
TCFL5
TDRKH
TECPR2
TENT5A
TERF2
TGFBRAP1
THNSL1
THRA
TKT
TLR6
TM4SF4
TMCC1
TMCO4
TMEM177
TMEM70
TMUB2
TNFRSF10B
TNIP1
TNKS
TNS1
TOB1
TOMM7
TOP1
TOP3A
TOR1A
TOR3A
TP53
TPM1
TPM2
TPP1
TPR
TPT1
TRAIP
TRANK1
TRIM4
TRIT1
TRMT2A
TRPV4
TRRAP
TSHZ1
TTBK2
TTC3
TTLL4
TUBA1B
UBE2L6
UBE2Q1
UBE4A
UBN1
UBR3
UHRF1BP1
UNC5D
URB2
USP36
USP42
USP9X
VCAN
VCP
VCPIP1
VIRMA
VPS13C
VPS13D
VPS18
VPS26B
VTI1B
WAPL
WARS2
WASF2
WASHC1
WASHC2C
WDFY1
WNK1
XPC
XRCC4
XRCC5
YIPF6
YTHDF1
YTHDF3
YWHAB
YWHAE
ZBED4
ZBED6CL
ZBTB12
ZBTB14
ZBTB21
ZBTB33
ZBTB38
ZBTB40
ZBTB43
ZBTB44
ZBTB6
ZBTB7B
ZC3H7A
ZC3H7B
ZC3HAV1
ZCCHC8
ZDHHC14
ZDHHC23
ZFP37
ZFP64
ZFP69B
ZFX
ZKSCAN4
ZKSCAN8
ZNF12
ZNF142
ZNF160
ZNF212
ZNF226
ZNF24
ZNF264
ZNF276
ZNF28
ZNF281
ZNF282
ZNF318
ZNF32
ZNF34
ZNF347
ZNF384
ZNF445
ZNF468
ZNF493
ZNF503
ZNF518A
ZNF521
ZNF529
ZNF551
ZNF564
ZNF586
ZNF638
ZNF678
ZNF721
ZNF766
ZNF778
ZNF791
ZNF800
ZNF839
ZNF883
ZSCAN20
ZSCAN30
ZSCAN31
ZSCAN32
ZSWIM9
ZZEF1
