# Supplementary material for: Integrative bioinformatics and experimental analysis revealed down-regulated CDC42EP3 as a novel prognostic target for ovarian cancer and its roles in immune infiltration
Source: PeerJ. 2021 Sep 15;9:e12171. doi: 10.7717/peerj.12171 (PMC8449529; doi:10.7717/peerj.12171)
Supplement: Supplemental Information 9 — qPCR confirmed the down-regulation of CDC42EP3 expression in ovarian cancer cells A2780 and TOV112D. [file peerj-09-12171-s009.xlsx]

## Sheet: 0
	Well	Fluor	Target	Content	Sample	Biological Set Name	Cq	Cq Mean	Cq Std. Dev	Starting Quantity (SQ)	Log Starting Quantity	SQ Mean	SQ Std. Dev	Set Point	Well Note	ΔCq	ΔΔCq	2-ΔΔCq
	H09	SYBR	Actin	Unkn	IOSE80		10.2312	10.2312	0				0	60
	H08	SYBR	Actin	Unkn	IOSE80		11.2163	11.2163	0				0	60
	H07	SYBR	Actin	Unkn	IOSE80		11.2342	11.2342	0				0	60
	H01	SYBR	Actin	Unkn	A2780		11.8893	11.8893	0				0	60
	H02	SYBR	Actin	Unkn	A2780		11.388	11.388	0				0	60
	H03	SYBR	Actin	Unkn	A2780		11.3627	11.3627	0				0	60
	H05	SYBR	Actin	Unkn	TOV112D		12.3222	12.3222	0				0	60
	H06	SYBR	Actin	Unkn	TOV112D		11.8724	11.8724	0				0	60
	H04	SYBR	Actin	Unkn	TOV112D		12.8276	12.8276	0				0	60
	A03	SYBR	CDC42EP3	Unkn	IOSE80		33.2764	33.2764	0				0	60		23.0452	0.00020165	1.00014
	B03	SYBR	CDC42EP3	Unkn	IOSE80		34.2764	34.2764	0				0	60		23.0601	0.0150658	1.0105
	C03	SYBR	CDC42EP3	Unkn	IOSE80		34.3784	34.3784	0				0	60		23.1442	0.0991587	1.07115
	B01	SYBR	CDC42EP3	Unkn	A2780		33.2112	33.2112	0				0	60		21.322	-1.72304	0.30291
	C01	SYBR	CDC42EP3	Unkn	A2780		32.999	32.999	0				0	60		21.611	-1.43399	0.370105
	A01	SYBR	CDC42EP3	Unkn	A2780		32.999	32.999	0				0	60		21.6363	-1.40873	0.376643
	A02	SYBR	CDC42EP3	Unkn	TOV112D		34.3829	34.3829	0				0	60		22.0607	-0.984271	0.505481
	C02	SYBR	CDC42EP3	Unkn	TOV112D		33.8002	33.8002	0				0	60		21.9278	-1.11716	0.461001
	B02	SYBR	CDC42EP3	Unkn	TOV112D		34.9998	34.9998	0				0	60		22.1723	-0.872741	0.546108

## Sheet: Run Information
File Name	admin_2021-06-30 18-52-51_CT001263.pcrd
Created By User	admin
Notes
ID
Run Started	2021/6/30 18:53:00 UTC +08:00
Run Ended	2021/6/30 19:52:51 UTC +08:00
Sample Vol	20
Lid Temp	105
Protocol File Name	2021/6/30 prcl
Plate Setup File Name	Quick Plate_96 wells_SYBR Only.pltd
Base Serial Number	CT001263
Optical Head Serial Number	785BR6577
CFX Manager Version	3.1.1517.0823.
